# Supplementary material
Source: HighWire-hosted journal article supplement (https://bmjopen.bmj.com/content/13/11/e071478)
Supplement: inline-supplementary-material-2 [file inline-supplementary-material-2.pdf]

Determinants of practice for providing decision coaching to facilitate informed values-based decision-making: protocol for a mixed-methods systematic review

## **Additional file 2 - Search strategy:**

Search Methods Section

Date: July 20, 2022

Prepared by Lindsey Sikora

### **Methods**

#### *Database searching*

The following databases were searched by a health sciences librarian (LS): Medline and Medline in Process via Ovid (1946 – July 19, 2022) and Embase Classic + Embase via Ovid (1947 – July 19, 2022), Cochrane CENTRAL via Ovid (June 2022), APA PsycInfo via Ovid (1806 – Week 2, July 2022), and CINAHL via EBSCOHost (1947 – July 20, 2022). A search strategy was developed in Medline and then translated into the other databases as appropriate (see Appendix I). The Medline search was peer reviewed using the PRESS tool by another information specialist (Valentina Ly). All databases were searched from dates of inception to October 28, 2021. All references were entered into an Endnote file for processing (n = 10720), and then were uploaded into Covidence for duplicate removal, and then screening.

*Acknowledgements: A special thanks to Valentina Ly (Research Librarian, Health Sciences, Medicine and STEM) at the University of Ottawa for her PRESS of the search strategy.*

#### **Database searches (numbers for PRISMA flowchart):**

Medline in Process and Medline (via Ovid): n = 3101

Embase (via Ovid): n = 4011

Cochrane CENTRAL (via Ovid): n = 611

APA PsycInfo (via Ovid): n = 968

CINAHL (via EBSCOHost): n = 2029

Total: n = 10720

Duplicates: n = 2265

Total with duplicates removed: n = 8455

## Appendix I – Search strategies

### Medline

- 1 decision making, shared/
- 2 ((shared or sharing or informed or collaborative) adj2 (decision\* or choice\* or decide\*)).tw,kw,kf.
- 3 \*Clinical Decision-Making/
- 4 \*decision making/
- 5 decision support techniques/
- 6 (decision adj (aid or aids or support\*)).tw,kw,kf.
- 7 decisionmaking.tw,kf,kw.
- 8 or/1-7
- 9 Mentoring/
- 10 Directive Counseling/ or "Referral and Consultation"/
- 11 \*Counseling/
- 12 (coach\* or facilitat\* or guidance or counsel\* or prepar\*).ti,ab.
- 13 or/9-12
- 14 Patient Participation/ or Patient Navigation/
- 15 Patient-Centered Care/
- 16 ((patient or patients or child\* or family or families or relative or relatives or caregiver\* or care giver\* or carer or carers or parent or parents or clinician\* or physician\* or doctor or doctors or provider\* or nurse\* or professional\*) adj2 (participat\* or collaborat\* or involv\* or partner\* or consult\*)).tw,kf,kw.
- 17 "patient centered".tw,kw,kf.
- 18 "patient centred".tw,kf,kw.
- 19 or/14-18
- 20 8 and 13 and 19

### Embase

- 1 shared decision making/
- 2 family decision making/
- 3 patient decision making/
- 4 ((shared or sharing or informed or collaborative) adj2 (decision\* or choice\* or decide\*)).tw.
- 5 (decision adj (aid or aids or support\*)).tw.
- 6 decisionmaking.tw.
- 7 or/1-6
- 8 mentoring/
- 9 directive counseling/ or e-counseling/ or family counseling/ or parent counseling/ or patient counseling/ or patient guidance/
- 10 (coach\* or facilitat\* or guidance or counsel\* or prepar\*).tw.
- 11 or/8-10
- 12 patient participation/
- 13 patient care/
- 14 ((patient or patients or child\* or family or families or relative or relatives or caregiver\* or care giver\* or carer or carers or parent or parents or clinician\* or physician\* or doctor or doctors

or provider\* or nurse\* or professional\*) adj2 (participat\* or collaborat\* or involv\* or partner\* or consult\*).tw.

15 "patient centered".tw.

16 "patient centred".tw.

17 or/12-16

18 7 and 11 and 17

## APA PsycInfo

1. decision making/

2. ((shared or sharing or informed or collaborative) adj2 (decision\* or choice\* or decide\*).tw.

3. (decision adj (aid or aids or support\*).tw.

4. decisionmaking.tw.

5. or/1-4

6. mentor/

7. counseling/

8. (coach\* or facilitat\* or guidance or counsel\* or prepar\*).tw.

9. or/6-8

10. client participation/

11. patient centered care/

12. ((patient or patients or child\* or family or families or relative or relatives or caregiver\* or care giver\* or carer or carers or parent or parents or clinician\* or physician\* or doctor or doctors or provider\* or nurse\* or professional\*) adj2 (participat\* or collaborat\* or involv\* or partner\* or consult\*).tw.

13. "patient centered".tw.

14. "patient centred".tw.

15. or/10-14

16. 5 and 9 and 15

## CENTRAL

1 decision making, shared/

2 ((shared or sharing or informed or collaborative) adj2 (decision\* or choice\* or decide\*).tw,kw,kf.

3 Clinical Decision-Making/

4 decision making/

5 decision support techniques/

6 (decision adj (aid or aids or support\*).tw,kw,kf.

7 decisionmaking.tw,kf,kw.

8 or/1-7

9 Mentoring/

10 Directive Counseling/ or "Referral and Consultation"/

11 Counseling/

12 (coach\* or facilitat\* or guidance or counsel\* or prepar\*).ti,ab.

13 or/9-12

14 Patient Participation/ or Patient Navigation/

15 Patient-Centered Care/

- 16 ((patient or patients or child\* or family or families or relative or relatives or caregiver\* or care giver\* or carer or carers or parent or parents or clinician\* or physician\* or doctor or doctors or provider\* or nurse\* or professional\*) adj2 (participat\* or collaborat\* or involv\* or partner\* or consult\*)).tw,kf,kw.
- 17 "patient centered".tw,kw,kf.
- 18 "patient centred".tw,kf,kw.
- 19 or/14-18
- 20 8 and 13 and 19

CINAHL

| Search Terms | Search Options                                                                                                                                                                                                                                                                                                                                                                                                                                                                                                                                                                                                                                       |
|--------------|------------------------------------------------------------------------------------------------------------------------------------------------------------------------------------------------------------------------------------------------------------------------------------------------------------------------------------------------------------------------------------------------------------------------------------------------------------------------------------------------------------------------------------------------------------------------------------------------------------------------------------------------------|
| S1           | (MH "Decision Making, Shared") OR (MH "Decision Making, Patient+")                                                                                                                                                                                                                                                                                                                                                                                                                                                                                                                                                                                   |
| S2           | T1 ( ((shared or sharing or informed or collaborative) N2 (decision* or choice* or decide*)) ) OR AB ( ((shared or sharing or informed or collaborative) N2 (decision* or choice* or decide*)) )                                                                                                                                                                                                                                                                                                                                                                                                                                                     |
| S3           | (MH "Decision Support Techniques")                                                                                                                                                                                                                                                                                                                                                                                                                                                                                                                                                                                                                   |
| S4           | T1 ( (decision N1 (aid or aids or support*)) ) OR AB ( (decision N1 (aid or aids or support*)) )                                                                                                                                                                                                                                                                                                                                                                                                                                                                                                                                                     |
| S5           | T1 decisionmaking OR AB decisionmaking                                                                                                                                                                                                                                                                                                                                                                                                                                                                                                                                                                                                               |
| S6           | S1 OR S2 OR S3 OR S4 OR S5                                                                                                                                                                                                                                                                                                                                                                                                                                                                                                                                                                                                                           |
| S7           | (MH "Mentorship")                                                                                                                                                                                                                                                                                                                                                                                                                                                                                                                                                                                                                                    |
| S8           | (MH "Counseling+")                                                                                                                                                                                                                                                                                                                                                                                                                                                                                                                                                                                                                                   |
| S9           | T1 ( (coach* or facilitat* or guidance or counsel* or prepar*) ) OR AB ( (coach* or facilitat* or guidance or counsel* or prepar*) )                                                                                                                                                                                                                                                                                                                                                                                                                                                                                                                 |
| S10          | S7 OR S8 OR S9                                                                                                                                                                                                                                                                                                                                                                                                                                                                                                                                                                                                                                       |
| S11          | (MH "Consumer Participation")                                                                                                                                                                                                                                                                                                                                                                                                                                                                                                                                                                                                                        |
| S12          | (MH "Patient Navigation") OR (MH "Patient Centered Care")                                                                                                                                                                                                                                                                                                                                                                                                                                                                                                                                                                                            |
| S13          | T1 ( ((patient or patients or child* or family or families or relative or relatives or caregiver* or care giver* or carer or carers or parent or parents or clinician* or physician* or doctor or doctors or provider* or nurse* or professional*) N2 (participat* or collaborat* or involv* or partner* or consult*)) ) OR AB ( ((patient or patients or child* or family or families or relative or relatives or caregiver* or care giver* or carer or carers or parent or parents or clinician* or physician* or doctor or doctors or provider* or nurse* or professional*) N2 (participat* or collaborat* or involv* or partner* or consult*)) ) |
| S14          | T1 "patient centered" OR AB "patient centered"                                                                                                                                                                                                                                                                                                                                                                                                                                                                                                                                                                                                       |
| S15          | T1 "patient centred" OR AB "patient centred"                                                                                                                                                                                                                                                                                                                                                                                                                                                                                                                                                                                                         |
| S16          | S11 OR S12 OR S13 OR S14 OR S15                                                                                                                                                                                                                                                                                                                                                                                                                                                                                                                                                                                                                      |

---

S17    S6 AND S10 AND S16

---
